# Supplementary material
Source: PubMed Central journal article supplement (PMC8223401)

## **Supplementary Materials for**

# **Impact of expressing cells on glycosylation and glycan of SARS-CoV-2 spike glycoprotein**

Yan Wang<sup>1</sup>, Zhen Wu<sup>2</sup>, Wenhua Hu<sup>3</sup>, Piliang Hao<sup>4</sup>, and Shuang Yang<sup>3\*</sup>

<sup>1</sup> Mass Spectrometry Facility, National Institute of Dental and Craniofacial Research, National Institutes of Health, Bethesda, MD 20892, USA

<sup>2</sup> State Key Laboratory of Genetic Engineering, Department of Biochemistry, School of Life Sciences, Fudan University, Shanghai 200438, China

<sup>3</sup> Center for Clinical Mass Spectrometry, Department of Pharmaceutical Analysis, Soochow University, Suzhou, Jiangsu 215123, China

<sup>4</sup> School of Life Science and Technology, ShanghaiTech University, Shanghai 201210, China

**Table S1. List of 98 unique sequence of SARS-CoV-2 spike receptor binding domain. These sequences were extracted from over 20,000 spike glycoproteins (downloaded from GISAID, [www.gisaid.org](http://www.gisaid.org)).**

| <b>Strain</b>                             |
|-------------------------------------------|
| SARS-CoV-2                                |
| 2019-12-24 Wuhan/IPBCAMS-WH-01/2019       |
| 2020-01-16 Shenzhen/SZTH-004/2020         |
| 2020-01-27 India/1-27/2020                |
| 2020-01-28 Shanghai/SH0007/2020           |
| 2020-02-01 Guangdong/GD2020087-P0008/2020 |
| 2020-02-11 Hong Kong/HKPU48-0202/2020     |
| 2020-02-19 Hong Kong/HKPU63-1402/2020     |
| 2020-02-25 Beijing/BJ1112/2020            |
| 2020-02-29 Belgium/BA-02291/2020          |
| 2020-02-29 USA/WA-S107/2020               |
| 2020-02-29 USA/WA-S106/2020               |
| 2020-03-00 USA/AZ-TG268417/2020           |
| 2020-03-01 USA/WA-S86/2020                |
| 2020-03-02 USA/WA-S32/2020                |
| 2020-03-02 USA/WA-S28/2020                |
| 2020-03-02 USA/WA-S22/2020                |
| 2020-03-02 USA/WA-S23/2020                |
| 2020-03-02 USA/WA-S20/2020                |
| 2020-03-02 USA/WA-S19/2020                |
| 2020-03-03 Finland/FIN03032020A/2020      |
| 2020-03-05 USA/WA15-UW11/2020             |
| 2020-03-05 USA/WA16-UW12/2020             |
| 2020-03-05 USA/WA17-UW13/2020             |
| 2020-03-05 France/B2340/2020              |
| 2020-03-05 USA/WA-UW40/2020               |
| 2020-03-05 USA/WA-S58/2020                |
| 2020-03-07 Australia/VIC18/2020           |
| 2020-03-08 USA/WA-UW31/2020               |
| 2020-03-09 USA/WA-UW68/2020               |
| 2020-03-10 USA/WA-UW91/2020               |
| 2020-03-11 USA/AZ-TG268905/2020           |
| 2020-03-11 Australia/NSW34/2020           |
| 2020-03-12 Wales/PHW27/2020               |
| 2020-03-12 USA/WA-S140/2020               |
| 2020-03-12 USA/WA-S139/2020               |
| 2020-03-12 Canada/ON_PHL6980/2020         |

2020-03-13|Scotland/CVR37/2020  
2020-03-13|Scotland/CVR42/2020  
2020-03-13|USA/WA-S137/2020  
2020-03-13|USA/WA-UW204/2020  
2020-03-13|USA/WA-NH13/2020  
2020-03-14|USA/WA-UW231/2020  
2020-03-14|USA/WA-UW270/2020  
2020-03-15|USA/WA-UW378/2020  
2020-03-15|USA/WA-UW292/2020  
2020-03-15|USA/WA-UW286/2020  
2020-03-16|Scotland/CVR140/2020  
2020-03-16|Scotland/CVR133/2020  
2020-03-16|USA/UN-UW-1402/2020  
2020-03-16|USA/AZ-TG268002/2020  
2020-03-16|USA/WA-UW323/2020  
2020-03-16|USA/WA-UW332/2020  
2020-03-16|USA/WA-UW338/2020  
2020-03-16|USA/UN-UW-1403/2020  
2020-03-16|USA/WA-UW244/2020  
2020-03-16|USA/WA-UW261/2020  
2020-03-17|Australia/VIC329/2020  
2020-03-17|USA/AZ-TG268099/2020  
2020-03-17|USA/AZ-TG268282/2020  
2020-03-17|Australia/VIC149/2020  
2020-03-17|USA/WA-S161/2020  
2020-03-17|Denmark/ALAB-HH65/2020  
2020-03-18|Australia/VIC171/2020  
2020-03-19|USA/WA-UW-1587/2020  
2020-03-19|USA/WA\_0432/2020  
2020-03-19|USA/WA-S176/2020  
2020-03-19|USA/WA-S221/2020  
2020-03-20|USA/AZ-TG271878/2020  
2020-03-20|USA/AZ-TG269238/2020  
2020-03-20|USA/AZ-TG269358/2020  
2020-03-20|England/20144067504/2020  
2020-03-21|Scotland/EDB084/2020  
2020-03-21|USA/NY-PV09019/2020  
2020-03-21|Scotland/CVR375/2020  
2020-03-22|Belgium/ULG-9641/2020  
2020-03-22|Netherlands/NA\_177/2020  
2020-03-24|Belgium/HCM-0324151/2020  
2020-03-24|USA/WA-S529/2020  
2020-03-25|Latvia/0002/2020

2020-03-26|Russia/Chechenya-83801/2020  
2020-03-26|Wales/PHWC-26365/2020  
2020-03-27|Australia/VIC662/2020  
2020-03-27|Netherlands/NA\_238/2020  
2020-03-27|USA/TX-HMH0284/2020  
2020-03-28|England/CAMB-74650/2020  
2020-03-29|England/20140002204/2020  
2020-03-30|England/20140064004/2020  
2020-03-31|Wales/PHWC-27C5A/2020  
2020-03-31|USA/TX-HMH0397/2020  
2020-04-01|Wales/PHWC-27CF0/2020  
2020-04-03|USA/NY-NYUMC330/2020  
2020-04-05|USA/NY-NYUMC287/2020  
2020-04-05|England/CAMB-7870E/2020  
2020-04-05|USA/WA-S470/2020  
2020-04-08|England/CAMB-7AC2B/2020  
2020-04-12|Scotland/EDB1424/2020  
2020-04-15|England/SHEF-C3CC9/2020

---

**Table S2. Quantitative profiling of N-glycans from SARS-CoV and SARS-CoV-2 expressed in HEK293 cells and baculovirus insect cells. The N-glycans were characterized by a Bruker autoflex MALDI-TOF/TOF-MS. (a) SARS-CoV-2 in HEK293, (b) SARS-CoV-2 in baculovirus insect, (c) SARS-CoV in Baculovirus insect.**

(a)

| Mass   | N-glycan | Composition                                                                         | Relative Abundance | Standard Deviation |
|--------|----------|-------------------------------------------------------------------------------------|--------------------|--------------------|
| 1079.1 | H3N2F1   | 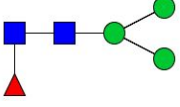   | 1.86%              | 0.78%              |
| 1136.4 | H3N3     |    | 1.62%              | 0.58%              |
| 1257.5 | H5N2     |    | 3.01%              | 1.30%              |
| 1282.5 | H3H3F1   |  | 1.46%              | 0.61%              |
| 1298.5 | H4N3     |  | 1.27%              | 0.55%              |
| 1339.5 | H3N5     |  | 2.93%              | 1.28%              |
| 1419.6 | H6N2     |  | 1.70%              | 0.74%              |
| 1444.6 | H4N3F1   |  | 1.32%              | 0.63%              |
| 1460.6 | H5N3     |  | 1.34%              | 0.57%              |

|        |        |                                                                                     |       |       |
|--------|--------|-------------------------------------------------------------------------------------|-------|-------|
| 1485.6 | H3N4F1 | 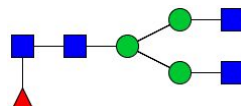   | 1.51% | 0.66% |
| 1501.6 | H4N4   |    | 1.26% | 0.54% |
| 1581.6 | H7N2   |    | 1.78% | 0.71% |
| 1606.6 | H5N3F1 |    | 1.37% | 0.57% |
| 1622.7 | H6N3   |    | 1.65% | 0.67% |
| 1647.7 | H4N4F1 |    | 1.85% | 0.67% |
| 1663.7 | H5N4   |  | 1.88% | 0.82% |
| 1688.7 | H3N5F1 |  | 1.58% | 0.70% |
| 1704.7 | H4N5   |  | 1.13% | 0.47% |
| 1743.7 | H8N2   |  | 1.58% | 0.68% |
| 1768.8 | H6N3F1 |  | 1.21% | 0.54% |
| 1793.8 | H4N4F2 |  | 1.61% | 0.65% |

|        |               |                                                                                     |       |       |
|--------|---------------|-------------------------------------------------------------------------------------|-------|-------|
| 1809.7 | H5N4F1        | 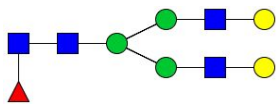   | 5.49% | 2.38% |
| 1825.8 | H6N4          |    | 1.13% | 0.46% |
| 1834.7 | S1(2,3)H4N4   |    | 1.06% | 0.43% |
| 1850.8 | H4N5F1        |    | 3.26% | 1.44% |
| 1866.7 | H5N5          |    | 1.11% | 0.50% |
| 1891.8 | H3N6F1        |    | 1.15% | 0.50% |
| 1905.7 | H9N2          |   | 1.29% | 0.51% |
| 1955.8 | H5N4F2        |  | 2.77% | 1.24% |
| 1967.7 | S1(2,6)H4N4F1 |  | 2.30% | 1.01% |
| 1996.8 | S1(2,3)H5N4   |  | 4.65% | 2.01% |
| 2012.8 | H5N5F1        |  | 3.42% | 1.47% |

|        |               |  |       |       |
|--------|---------------|--|-------|-------|
| 2028.8 | H6N5          |  | 1.07% | 0.46% |
| 2037.9 | S1(2,3)H4N5   |  | 1.39% | 0.51% |
| 2053.9 | H4N6F1        |  | 1.03% | 0.46% |
| 2100.8 | H5N4F3        |  | 1.20% | 0.57% |
| 2128.8 | S1(2,6)H5N4F1 |  | 1.82% | 0.77% |
| 2142.9 | S1(2,3)H5N4F1 |  | 2.01% | 0.87% |
| 2158.9 | H5N5F2        |  | 1.33% | 0.46% |
| 2174.9 | H6N5F1        |  | 2.36% | 1.03% |
| 2185.9 | S1(2,6)H5N5   |  | 1.37% | 0.59% |
| 2215.9 | H5N6F1        |  | 1.23% | 0.47% |
| 2274.9 | S1(2,6)H5N4F2 |  | 0.92% | 0.38% |



|        |               |  |       |       |
|--------|---------------|--|-------|-------|
| 2289.0 | S1(2,3)H5N4F2 |  | 0.83% | 0.33% |
| 2304.9 | H5N5F3        |  | 0.92% | 0.39% |
| 2320.9 | H6N5F2        |  | 1.16% | 0.51% |
| 2330.9 | S2(2,3)H5N4   |  | 0.48% | 0.07% |
| 2332.0 | S1(2,6)H5N5F1 |  | 0.89% | 0.38% |
| 2361.9 | S1(2,3)H6N5   |  | 1.17% | 0.53% |
| 2377.9 | H6N6F1        |  | 1.36% | 0.60% |
| 2402.9 | H4N7F2        |  | 0.89% | 0.17% |
| 2448.2 | S2(2,6)H5N4F1 |  | 0.71% | 0.30% |

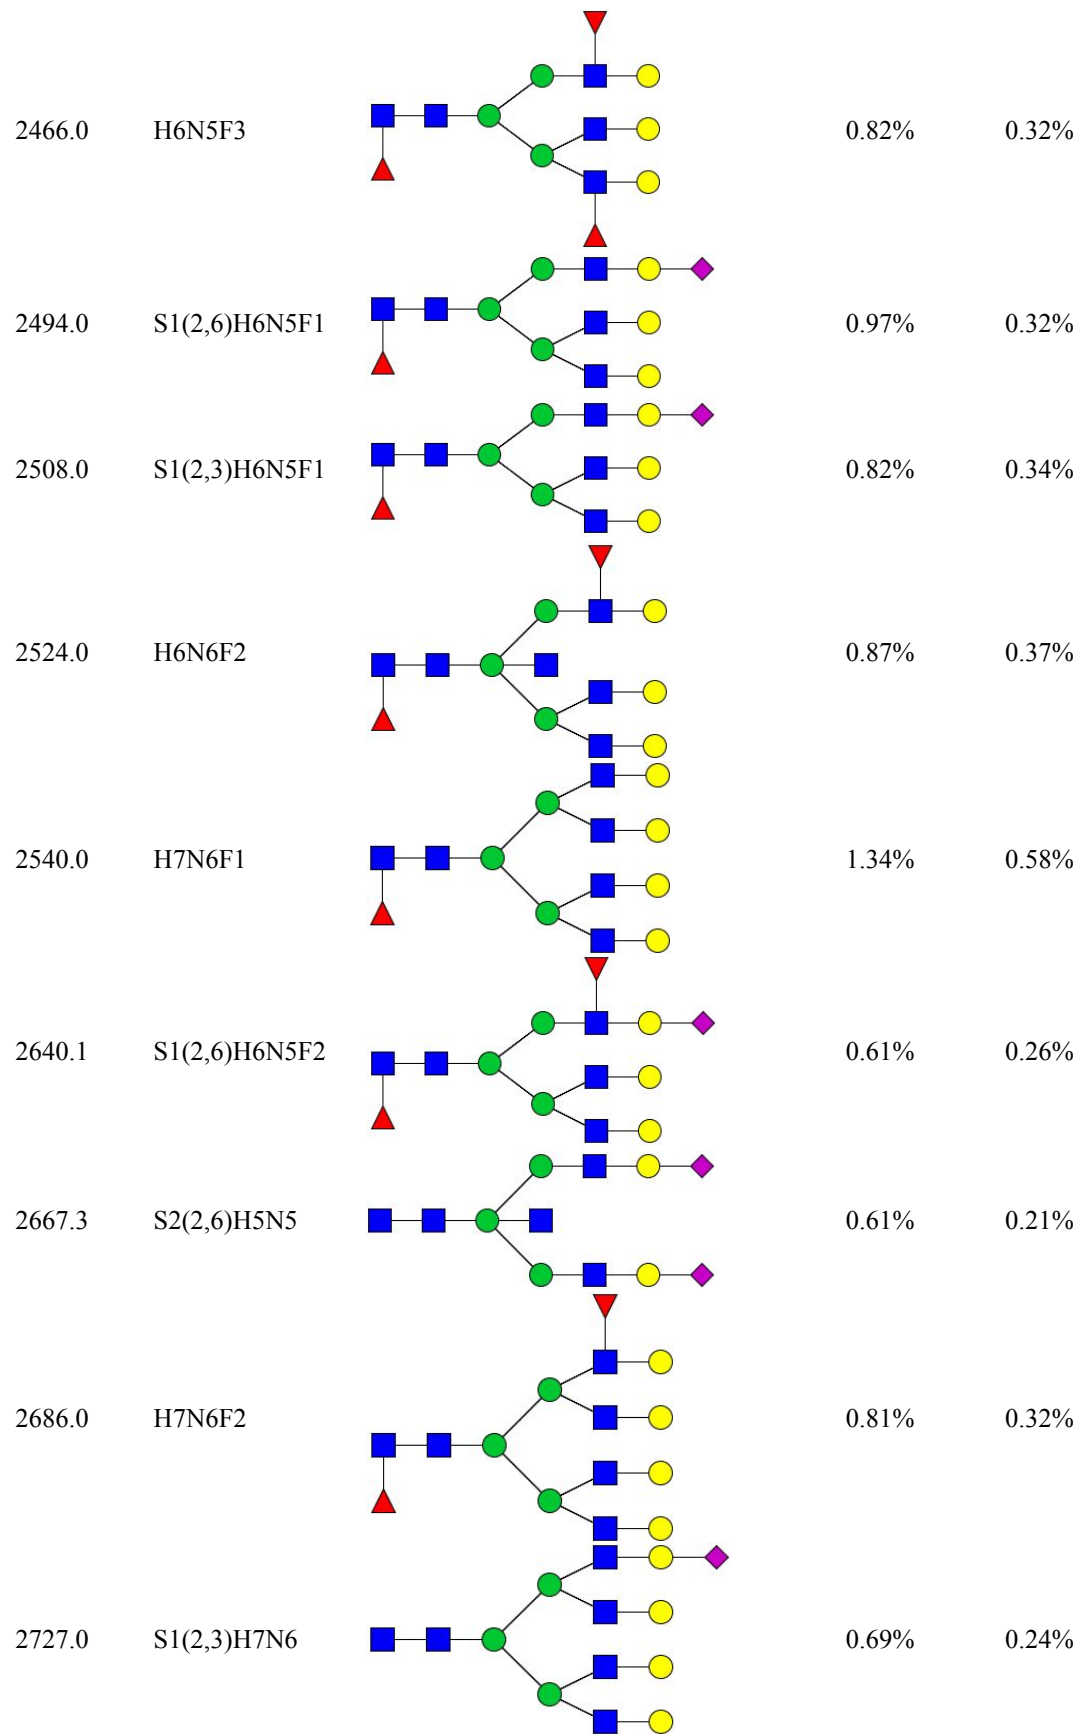

S10

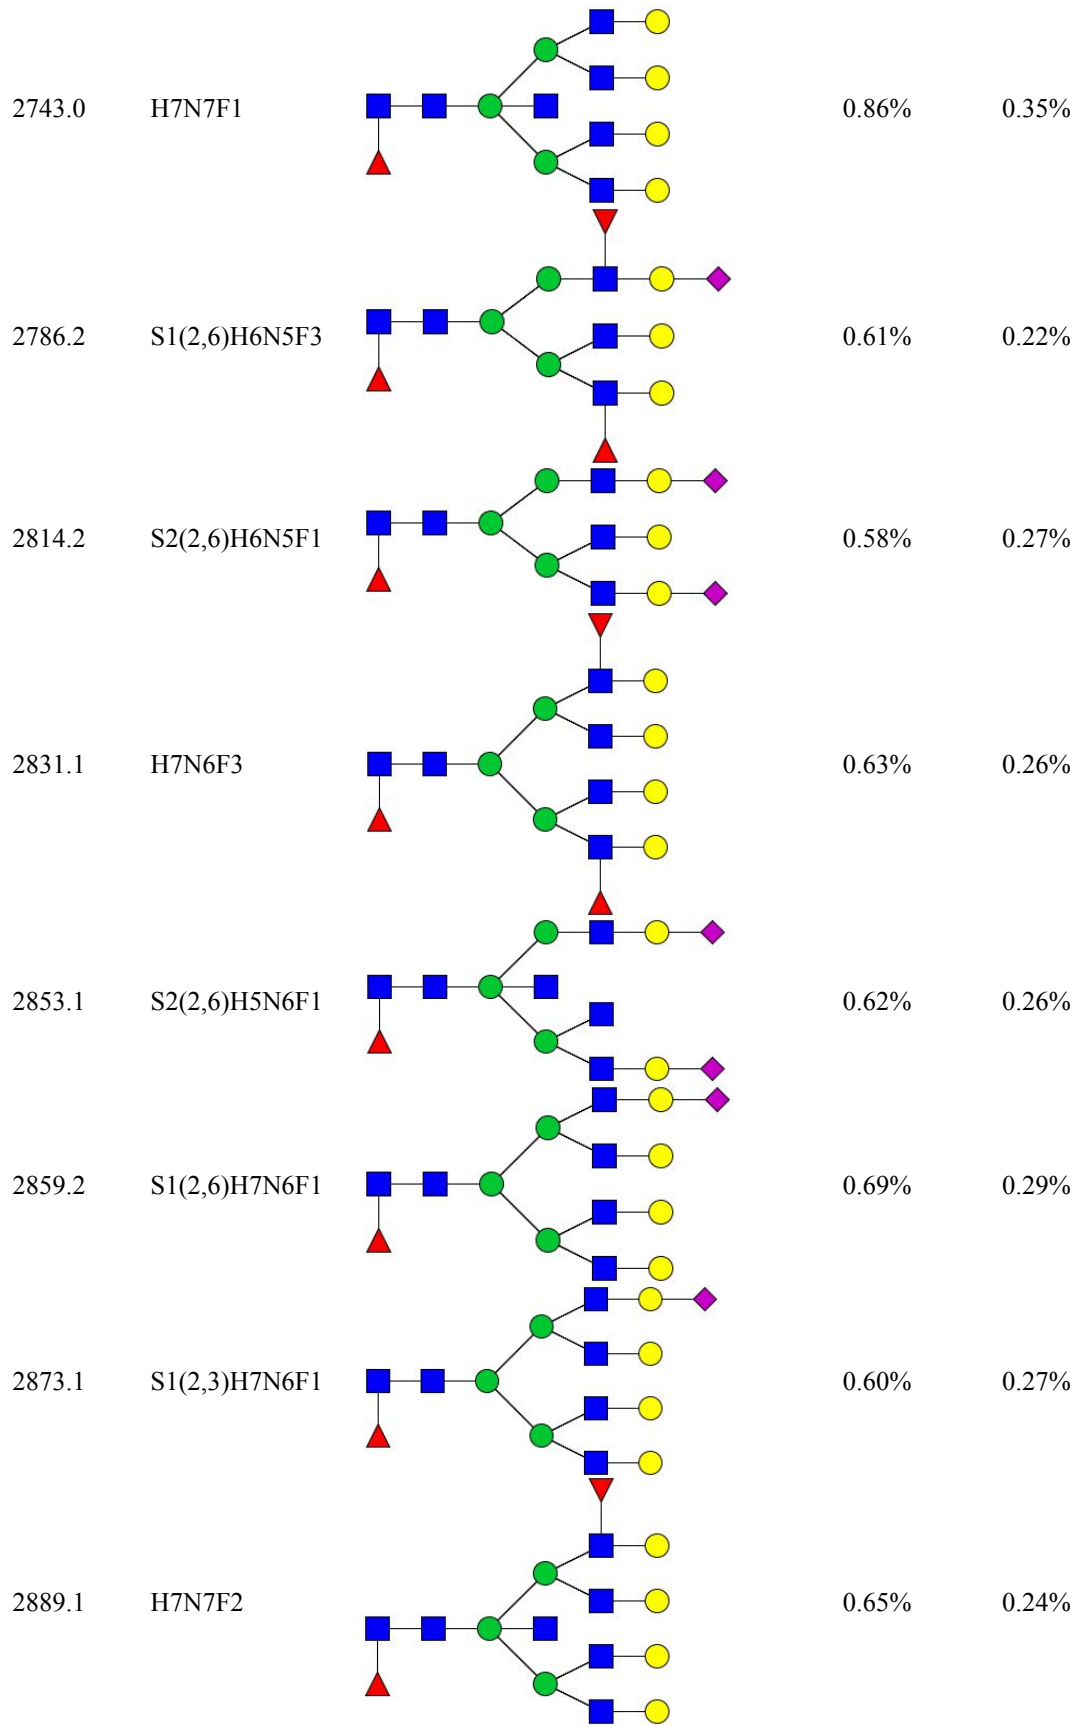

S11

|        |        |                                                                                   |       |       |
|--------|--------|-----------------------------------------------------------------------------------|-------|-------|
| 3035.2 | H7N7F3 | 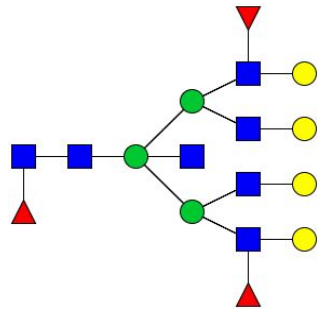 | 0.50% | 0.20% |
|--------|--------|-----------------------------------------------------------------------------------|-------|-------|

(b)

| Mass   | N-glycan | Composition                                                                         | Relative Abundance | Standard Deviation |
|--------|----------|-------------------------------------------------------------------------------------|--------------------|--------------------|
| 933.4  | H3N2     | 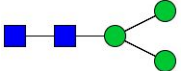   | 7.08%              | 2.44%              |
| 1079.5 | H3N2F1   |    | 18.58%             | 5.70%              |
| 1136.1 | H3N3     |    | 3.76%              | 1.54%              |
| 1257.6 | H5N2     |  | 5.47%              | 1.83%              |
| 1282.6 | H3H3F1   |  | 4.16%              | 1.70%              |
| 1298.3 | H4N3     |  | 3.21%              | 1.26%              |
| 1339.6 | H3N4     |  | 6.78%              | 2.28%              |
| 1419.7 | H6N2     |  | 5.18%              | 1.83%              |
| 1460.7 | H5N3     |  | 3.12%              | 1.06%              |
| 1485.6 | H3N4F1   |  | 4.11%              | 1.51%              |
| 1501.5 | H4N4     |  | 3.06%              | 1.37%              |
| 1581.7 | H7N2     |  | 5.10%              | 1.69%              |

|        |               |                                                                                     |       |       |
|--------|---------------|-------------------------------------------------------------------------------------|-------|-------|
| 1743.8 | H8N2          | 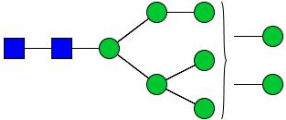   | 4.44% | 1.35% |
| 1809.6 | H5N4F1        |    | 2.93% | 1.11% |
| 1905.8 | H9N2          |    | 3.87% | 1.35% |
| 1967.8 | S1(2,6)H4N4F1 |    | 8.39% | 2.80% |
| 2012.8 | H5N5F1        |    | 2.78% | 1.02% |
| 2053.7 | H4N6F1        |    | 2.42% | 0.90% |
| 2129.9 | S1(2,6)H5N4F1 |   | 2.73% | 0.87% |
| 2142.9 | S1(2,3)H5N4F1 |  | 2.83% | 1.11% |

(c)

| N-glycan | Mass     | Composition                                                                         | Relative Abundance | Standard Deviation |
|----------|----------|-------------------------------------------------------------------------------------|--------------------|--------------------|
| H3N2     | 933.448  | 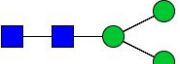 | 12.25%             | 5.46%              |
| H3N2F1   | 1079.523 |  | 30.80%             | 14.03%             |
| H3N3     | 1136.531 |  | 4.98%              | 1.87%              |
| H5N2     | 1257.687 |  | 4.63%              | 2.16%              |
| H3H3F1   | 1282.621 |  | 4.67%              | 2.05%              |
| H4N3     | 1298.584 |  | 2.81%              | 1.28%              |

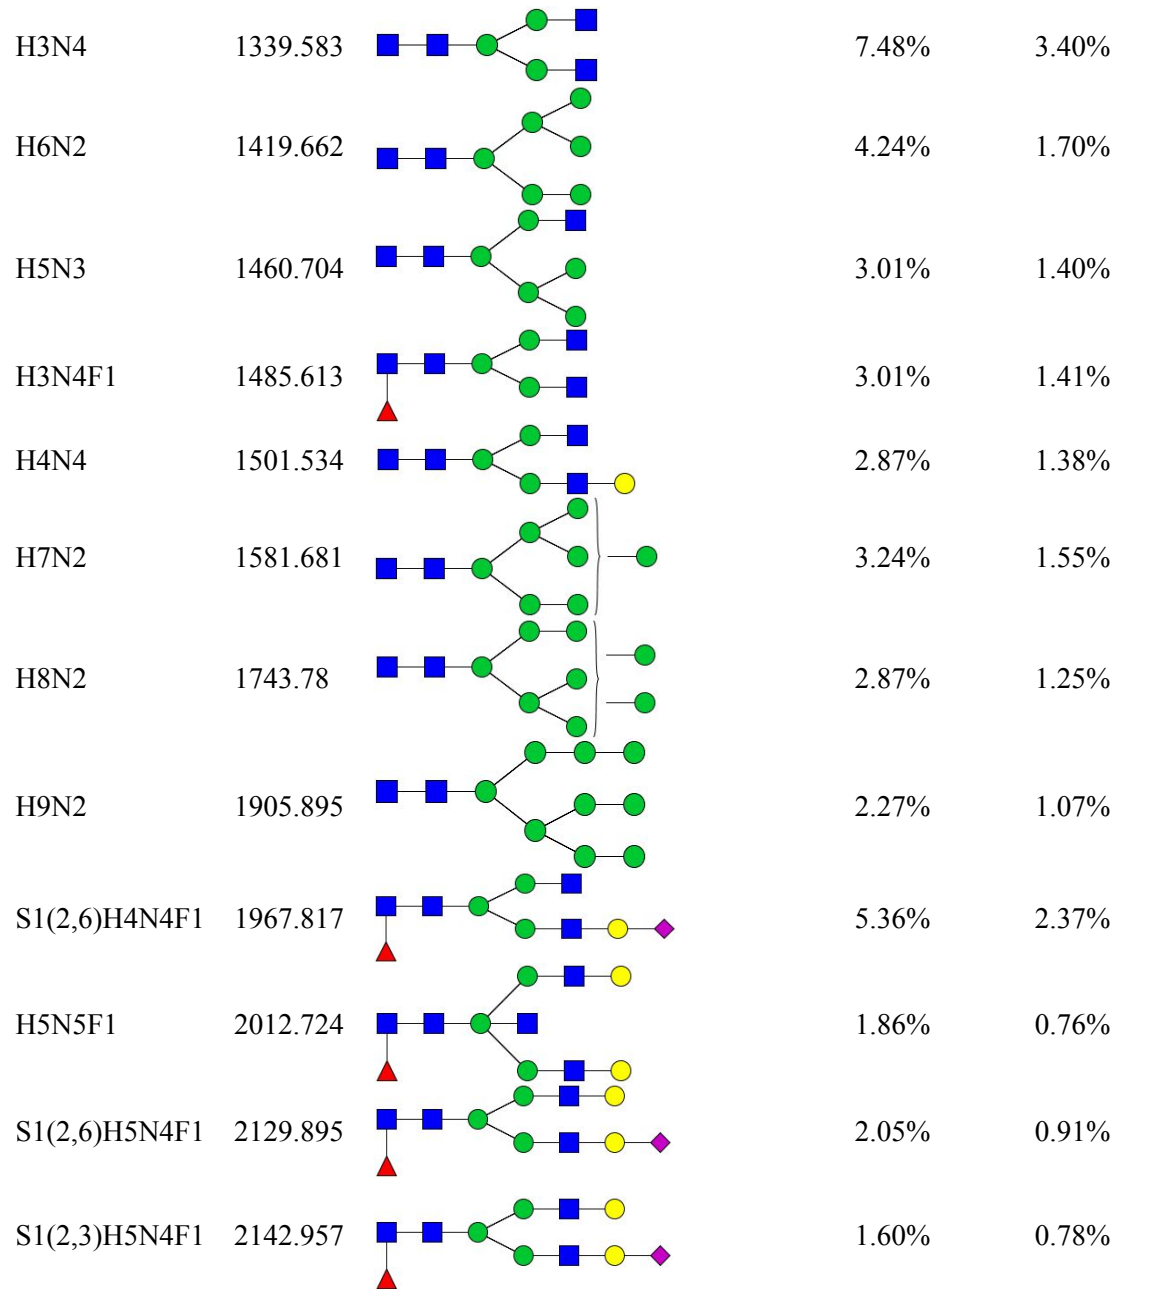

**Table S3. O-glycosite prediction based on amino acid sequence of SARS-CoV-2 using ISOglyP. The score < 0.1 sets as “Low”, between 0.1 and 1.5 as “Medium”, and > 1.5 as “High”. Charge is calculated at pH 7.0, assuming D or E as -1, R or K as +1, other amino acids as 0. Note: if the content in the “Detected in our study” is blank indicates not detected.**

| O-glycosite | O-glycopeptide | Score  | Remark | Charge | Detected in our study |
|-------------|----------------|--------|--------|--------|-----------------------|
| S[12]       | LLPLVSSQCVN    | 1.1920 | Medium | 0      |                       |
| S[13]       | LPLVSSQCVNL    | 0.6588 | Medium | 0      |                       |
| T[19]       | QCVNLTTRTQL    | 1.0946 | Medium | 1      |                       |
| T[20]       | CVNLTTRTQLP    | 1.1101 | Medium | 1      |                       |
| T[22]       | NLTTRTQLPPA    | 3.4187 | High   | 1      | Yes                   |
| T[29]       | LPPAYTNSFTR    | 0.6135 | Medium | 1      | Yes                   |
| S[31]       | PAYTNSFTRGV    | 0.0909 | Low    | 1      | Yes                   |
| T[33]       | YTNSFTRGVYY    | 2.3044 | High   | 1      | Yes                   |
| S[45]       | DKVFRSSVLHS    | 0.1990 | Medium | 0      |                       |
| S[46]       | KVFRSSVLHST    | 0.1733 | Medium | 2      |                       |
| S[50]       | SSVLHSTQDLF    | 0.1762 | Medium | -1     | Yes                   |
| T[51]       | SVLHSTQDLFL    | 0.7108 | Medium | -1     | Yes                   |
| S[60]       | FLPFFSNVTWF    | 0.2802 | Medium | 0      |                       |
| T[63]       | FFSNVTWFHAI    | 0.9574 | Medium | 0      |                       |
| S[71]       | HAIHVSNGTNGT   | 0.6026 | Medium | 0      | Yes                   |
| T[73]       | IHVSGTNGTKR    | 2.3116 | High   | 2      | Yes                   |
| T[76]       | SGTNGTKRFDN    | 1.2737 | Medium | 1      |                       |
| S[94]       | GVYFASTTEKSN   | 0.5115 | Medium | -1     | Yes                   |
| T[95]       | VYFASTTEKSNI   | 3.1650 | High   | 0      | Yes                   |
| S[98]       | ASTEKSNIIRG    | 0.0549 | Low    | 1      | Yes                   |
| T[108]      | GWIFGTTLDISK   | 1.0208 | Medium | 0      | Yes                   |
| T[109]      | WIFGTTLDISKT   | 1.2884 | Medium | 0      | Yes                   |
| S[112]      | GTTLDISKTQSL   | 0.0970 | Low    | 0      |                       |
| T[114]      | TLDISKTQSLLI   | 0.4915 | Medium | 0      |                       |
| S[116]      | DSKTQSLLIVN    | 0.0482 | Low    | 0      |                       |
| T[124]      | IVNNAITNVVIK   | 0.6497 | Medium | 1      |                       |
| S[151]      | HKNNKSWMESE    | 0.1139 | Medium | 0      |                       |
| S[155]      | KSWMESEFRVY    | 0.0627 | Low    | 0      |                       |
| S[161]      | EFRVYSSANNC    | 0.8680 | Medium | 0      |                       |
| S[162]      | FRVYSSANNCT    | 0.3894 | Medium | 1      |                       |
| T[167]      | SANNCTFEYVS    | 0.5920 | Medium | -1     |                       |
| S[172]      | TFEYVSQPFLM    | 0.7019 | Medium | -1     |                       |
| S[205]      | YFKIYSKHTPI    | 0.1869 | Medium | 2      |                       |
| T[208]      | IYSKHTPINLV    | 0.5399 | Medium | 1      |                       |

|        |              |        |        |    |     |
|--------|--------------|--------|--------|----|-----|
| S[221] | LPQGFSALEPL  | 0.1844 | Medium | -1 |     |
| T[236] | IGINITRFQTL  | 1.4318 | Medium | 1  |     |
| T[240] | ITRFQTLLALH  | 0.3274 | Medium | 1  |     |
| S[247] | LALHRSYLTPG  | 0.0677 | Low    | 1  | Yes |
| T[250] | HRSYLTPGDSS  | 3.5902 | High   | 0  | Yes |
| S[254] | LTPGDSSSGWT  | 1.2752 | Medium | -1 | Yes |
| S[255] | TPGDSSSGWTA  | 1.4043 | Medium | -1 | Yes |
| S[256] | PGDSSSGWTAG  | 0.7722 | Medium | -1 | Yes |
| T[259] | SSSGWTAGAAA  | 6.0696 | High   | 0  | Yes |
| T[274] | YLQPRTFLLKY  | 0.2740 | Medium | 2  |     |
| T[284] | YNENGTITDAV  | 1.4890 | Medium | -2 |     |
| T[286] | ENGTITDAVDC  | 2.7074 | High   | -3 | Yes |
| S[297] | ALDPLSETKCT  | 0.2445 | Medium | -1 | Yes |
| T[299] | DPLSETKCTLK  | 0.9730 | Medium | 1  | Yes |
| T[302] | SETKCTLKSF   | 0.4250 | Medium | 1  |     |
| S[305] | KCTLKSFVTEK  | 0.0994 | Low    | 2  |     |
| T[307] | TLKSFVTEKGI  | 0.6810 | Medium | 1  |     |
| T[315] | KGIYQTSNFRV  | 0.3332 | Medium | 2  | Yes |
| S[316] | GIYQTSNFRVQ  | 0.0712 | Low    | 1  | Yes |
| T[323] | FRVQPTESIVR  | 6.9578 | High   | 1  | Yes |
| S[325] | VQPTESIVRFP  | 0.1755 | Medium | 0  | Yes |
| T[333] | RFPNITNLCPF  | 0.8002 | Medium | 1  |     |
| T[345] | EVFNATRFASV  | 0.8321 | Medium | 0  |     |
| S[349] | ATRFASVYAWN  | 0.4014 | Medium | 1  | Yes |
| S[359] | NRKRISNCVAD  | 0.2025 | Medium | 2  | Yes |
| S[366] | CVADYSVLYNS  | 0.4507 | Medium | -1 | Yes |
| S[371] | SVLYNSASFST  | 0.2287 | Medium | 0  | Yes |
| S[373] | LYNSASFSTFK  | 0.4814 | Medium | 1  |     |
| S[375] | NSASFSTFKCY  | 0.1546 | Medium | 1  | Yes |
| T[376] | SASFSTFKCYG  | 0.6416 | Medium | 1  | Yes |
| S[383] | KCYGVSPTKLN  | 1.6796 | Medium | 2  |     |
| T[385] | YGVSPTKLNDL  | 1.9215 | Medium | 0  |     |
| T[393] | NDLCFTNVYAD  | 0.7760 | Medium | -2 |     |
| S[399] | NVYADSFVIRG  | 0.1311 | Medium | -2 |     |
| T[415] | IAPGQTGKIAD  | 0.5828 | Medium | 0  |     |
| T[430] | LPDDFTGCVIA  | 1.5743 | Medium | -2 | Yes |
| S[438] | VIAWNSNNLDS  | 0.0571 | Low    | -1 | Yes |
| S[443] | SNNLDSKVGGN  | 0.1871 | Medium | 0  | Yes |
| S[459] | RLFRKSNLKPF  | 0.0296 | Low    | 4  |     |
| S[469] | FERDISTEIIYQ | 0.1938 | Medium | -2 | Yes |
| T[470] | ERDISTEIIYQA | 2.4744 | High   | -2 | Yes |
| S[477] | IYQAGSTPCNG  | 1.0391 | Medium | 0  | Yes |
| T[478] | YQAGSTPCNGV  | 3.9641 | High   | 0  | Yes |



|        |                                                |        |        |    |     |
|--------|------------------------------------------------|--------|--------|----|-----|
| S[494] | YFPLQ <b>S</b> YGFQP                           | 0.1411 | Medium | 0  | Yes |
| T[500] | YGFQP <b>T</b> NGVGY                           | 3.3049 | High   | 0  | Yes |
| S[514] | RVVVL <b>S</b> FELLH                           | 0.0490 | Low    | 0  |     |
| T[523] | LHAP <b>A</b> TVCGPK                           | 3.4564 | High   | 1  | Yes |
| S[530] | CGPK <b>K</b> STNLVK                           | 0.0640 | Low    | 3  |     |
| T[531] | GPK <b>K</b> STNLVKN                           | 0.2080 | Medium | 3  |     |
| T[547] | NFNG <b>L</b> TGTGVL                           | 1.0657 | Medium | 0  | Yes |
| T[549] | NGL <b>T</b> GTGVLTE                           | 1.0029 | Medium | -1 | Yes |
| T[553] | GTG <b>V</b> L <b>T</b> ESNKK                  | 0.6164 | Medium | 1  | Yes |
| S[555] | G <b>V</b> L <b>T</b> ESNKKFL                  | 0.0687 | Low    | 1  | Yes |
| T[572] | RDI <b>A</b> D <b>T</b> TD <b>A</b> VR         | 2.4076 | High   | -3 | Yes |
| T[573] | DI <b>A</b> D <b>T</b> TD <b>A</b> VRD         | 2.2810 | High   | -3 | Yes |
| T[581] | VRDP <b>Q</b> TLEILD                           | 0.7893 | Medium | -2 | Yes |
| T[588] | EILD <b>I</b> T <b>P</b> CSFG                  | 7.1238 | High   | -2 |     |
| S[591] | DIT <b>P</b> C <b>S</b> FGGVS                  | 0.4761 | Medium | -1 | Yes |
| S[596] | SFG <b>G</b> V <b>S</b> VITPG                  | 1.0307 | Medium | 0  |     |
| T[599] | G <b>V</b> S <b>V</b> I <b>T</b> PGTNT         | 6.9243 | High   | 0  | Yes |
| T[602] | VIT <b>P</b> G <b>T</b> NTSNQ                  | 1.1711 | Medium | 0  |     |
| T[604] | TPG <b>T</b> NTSNQVA                           | 0.4224 | Medium | 0  |     |
| S[605] | PG <b>T</b> NT <b>S</b> NQVAV                  | 0.1877 | Medium | 0  |     |
| T[618] | QDV <b>N</b> C <b>T</b> EV <b>P</b> V <b>A</b> | 4.2140 | High   | -1 |     |
| T[630] | H <b>A</b> D <b>Q</b> L <b>T</b> PTWRV         | 3.3027 | High   | 1  | Yes |
| T[632] | D <b>Q</b> L <b>T</b> PTWRVYS                  | 2.8662 | High   | 2  | Yes |
| S[637] | TWR <b>V</b> Y <b>S</b> TGSNV                  | 0.8525 | Medium | 1  | Yes |
| T[638] | WR <b>V</b> Y <b>S</b> TGSNVF                  | 1.4816 | Medium | 1  | Yes |
| S[640] | VY <b>S</b> T <b>G</b> SNVFQT                  | 0.1835 | Medium | 0  | Yes |
| T[645] | SN <b>V</b> F <b>Q</b> TRAGCL                  | 1.5858 | Medium | 1  | Yes |
| S[659] | EHV <b>N</b> N <b>S</b> YECDI                  | 0.2044 | Medium | -3 |     |
| S[673] | AGI <b>C</b> A <b>S</b> YQTQT                  | 0.3376 | Medium | 0  | Yes |
| T[676] | C <b>A</b> S <b>Y</b> Q <b>T</b> QTNSP         | 0.9560 | Medium | 0  | Yes |
| T[678] | S <b>Y</b> Q <b>T</b> Q <b>T</b> NSPRR         | 6.1133 | High   | 2  | Yes |
| S[680] | Q <b>T</b> Q <b>T</b> NS <b>P</b> RRAR         | 0.5408 | Medium | 3  | Yes |
| S[686] | PRR <b>A</b> R <b>S</b> VASQS                  | 0.6710 | Medium | 2  | *   |
| S[689] | AR <b>S</b> VASQSIIA                           | 0.8753 | Medium | 1  | *   |
| S[691] | SVASQSII <b>A</b> YT                           | 0.2922 | Medium | 0  | *   |
| T[696] | SI <b>I</b> A <b>Y</b> TMSLGA                  | 0.9601 | Medium | 0  | *   |
| S[698] | I <b>A</b> Y <b>T</b> M <b>S</b> LGAEN         | 0.3105 | Medium | -1 | *   |
| S[704] | L <b>G</b> A <b>E</b> NSVAYS <b>N</b>          | 0.8728 | Medium | -1 | *   |
| S[708] | NS <b>V</b> A <b>S</b> NN <b>S</b> IA          | 0.2968 | Medium | 0  | *   |
| S[711] | A <b>S</b> NN <b>S</b> IA <b>I</b> PT          | 0.3149 | Medium | 0  | *   |
| T[716] | S <b>I</b> A <b>I</b> PT <b>N</b> FTIS         | 1.0180 | Medium | 0  | *   |
| T[719] | I <b>P</b> T <b>N</b> FTIS <b>V</b> TT         | 1.8406 | Medium | 0  | *   |
| S[721] | T <b>N</b> FTIS <b>V</b> TT <b>E</b> I         | 0.5721 | Medium | -1 | *   |

|         |              |        |        |    |   |
|---------|--------------|--------|--------|----|---|
| T[723]  | FTISVTTEILP  | 1.3194 | Medium | -1 | * |
| T[724]  | TISVTTEILPV  | 0.4756 | Medium | -1 | * |
| S[730]  | EILPVSMTKTS  | 0.6182 | Medium | 0  | * |
| T[732]  | LPVSMTKTSVD  | 0.9736 | Medium | 0  | * |
| T[734]  | VSMTKTSVDCT  | 0.6236 | Medium | 0  | * |
| S[735]  | SMTKTSVDCTM  | 0.4144 | Medium | 0  | * |
| T[739]  | TSVDCTMYICG  | 0.7111 | Medium | -1 | * |
| S[746]  | YICGDSTECNSN | 0.3403 | Medium | -2 | * |
| T[747]  | ICGDSTECNSL  | 2.2063 | High   | -2 | * |
| S[750]  | DSTECNSLLLQ  | 0.0613 | Low    | -2 | * |
| S[758]  | LLQYGSFCTQL  | 0.2721 | Medium | 0  | * |
| T[761]  | YGSFCTQLNRA  | 0.4619 | Medium | 1  | * |
| T[768]  | LNRALTGIAVE  | 0.8062 | Medium | 0  | * |
| T[778]  | EQDKNTQEVFA  | 0.4579 | Medium | -2 | * |
| T[791]  | KQIYKTPPIKD  | 2.4684 | High   | 0  | * |
| S[803]  | GGFNFSQILPD  | 0.1008 | Medium | -1 | * |
| S[810]  | ILPDPSKPSKR  | 1.0522 | Medium | 2  | * |
| S[813]  | DPSKPSKRSFI  | 0.4460 | Medium | 2  | * |
| S[816]  | KPSKRSFIEDL  | 0.0304 | Low    | 1  | * |
| T[827]  | LFNKVTLADAG  | 0.9710 | Medium | 0  | * |
| T[859]  | KFNGLTVLPPL  | 2.5290 | High   | 1  | * |
| T[866]  | LPPLLTDEMIA  | 0.3977 | Medium | -2 | * |
| T[874]  | MIAQYTSALLA  | 1.0765 | Medium | 0  | * |
| S[875]  | IAQYTSALLAG  | 0.1454 | Medium | 0  | * |
| T[881]  | ALLAGTITSGW  | 1.8512 | Medium | 0  | * |
| T[883]  | LAGTITSGWTF  | 2.9975 | High   | 0  | * |
| S[884]  | AGTITSGWTFG  | 0.3768 | Medium | 0  | * |
| T[887]  | ITSGWTFGAGA  | 1.7742 | Medium | 0  | * |
| T[912]  | NGIGVTQNVLY  | 1.6318 | Medium | 0  | * |
| S[929]  | ANQFNSAIGKI  | 0.2422 | Medium | 1  | * |
| S[937]  | GKIQDSLSTA   | 0.3406 | Medium | 0  | * |
| S[939]  | IQDSLSTASA   | 0.5543 | Medium | -1 | * |
| S[940]  | QDSLSTASAL   | 1.3583 | Medium | -1 | * |
| T[941]  | DSLSTASALG   | 3.2324 | High   | -1 | * |
| S[943]  | LSSTASALGKL  | 0.5452 | Medium | 1  | * |
| T[961]  | AQALNTLVKQL  | 0.2233 | Medium | 1  | * |
| S[967]  | LVKQLSSNFGA  | 0.0645 | Low    | 1  | * |
| S[968]  | VKQLSSNFGAI  | 0.1571 | Medium | 1  | * |
| S[974]  | NFGAISSVLND  | 0.5690 | Medium | -1 | * |
| S[975]  | FGAISSVLNDI  | 0.3611 | Medium | -1 | * |
| S[982]  | LNDILSRLDKV  | 0.0961 | Low    | 0  | * |
| T[998]  | IDRLITGRLQS  | 0.4928 | Medium | 1  | * |
| S[1003] | TGRLQSLQTYV  | 0.1012 | Medium | 1  | * |

|         |               |        |        |    |   |
|---------|---------------|--------|--------|----|---|
| T[1006] | LQSLQTYVTTQQ  | 0.5893 | Medium | 0  | * |
| T[1009] | LQTYVTTQQLIR  | 1.3446 | Medium | 1  | * |
| S[1021] | AEIRASANLAA   | 0.2520 | Medium | 1  | * |
| T[1027] | ANLAATKMSEC   | 1.1134 | Medium | 0  | * |
| S[1030] | AATKMSECVLG   | 0.1981 | Medium | 0  | * |
| S[1037] | CVLGQSKRVDF   | 0.3929 | Medium | 1  | * |
| S[1051] | GYHLMSFPQSA   | 0.1247 | Medium | 0  | * |
| S[1055] | MSFPQSAPHGV   | 0.3151 | Medium | 0  | * |
| T[1066] | VFLHVTTYVPAQ  | 3.6749 | High   | 0  | * |
| T[1076] | QEKNFTTAPAI   | 6.9229 | High   | 0  | * |
| T[1077] | EKNFTTAPAIC   | 1.6531 | Medium | 0  | * |
| S[1097] | EGVVFVSNATHW  | 0.7228 | Medium | -1 | * |
| T[1100] | FVSNATHWFVT   | 0.4895 | Medium | 0  | * |
| T[1105] | THWFVTQRNFY   | 2.6538 | High   | 1  | * |
| T[1116] | EPQIITDNTF    | 0.7849 | Medium | -1 | * |
| T[1117] | PQIITDNTFV    | 0.6806 | Medium | -1 | * |
| T[1120] | ITDNTFVSGN    | 0.4157 | Medium | -1 | * |
| S[1123] | DNTFVSGNCDV   | 0.3201 | Medium | -2 | * |
| T[1136] | GIVNNTVYDPL   | 0.5617 | Medium | -1 | * |
| S[1147] | QPELDSFKEEL   | 0.0551 | Low    | -3 | * |
| T[1160] | YFKNHTSPDVD   | 0.7881 | Medium | -1 | * |
| S[1161] | FKNHTSPDVDL   | 0.7316 | Medium | -1 | * |
| S[1170] | DLGDISGINAS   | 0.1702 | Medium | -1 | * |
| S[1175] | SGINASVVNIQ   | 0.7879 | Medium | 0  | * |
| S[1196] | KNLNEIDLQ     | 0.0580 | Low    | -2 | * |
| T[1231] | AIVMVTIMLCC   | 1.3899 | Medium | 0  | * |
| T[1238] | MLCCMTSCCSC   | 1.8240 | Medium | 0  | * |
| S[1239] | LCCMTSCCSCSCL | 0.4704 | Medium | 0  | * |
| S[1242] | MTSCCCLKGC    | 0.1889 | Medium | 1  | * |
| S[1249] | LKGCCSCGSCC   | 0.8926 | Medium | 1  | * |
| S[1252] | CCSCGSCCKFD   | 0.4318 | Medium | 0  | * |
| S[1261] | FDEDDSEPVLK   | 0.3672 | Medium | -4 | * |
| T[1273] | VKLHYT        | 1.2243 | Medium | 1  | * |

\* These sites belong to S2 domain and did not test in this study.

**Table S4. O-glycans for Byonic O-glycopeptide search. O-glycans were prepared by the solid-phase glycan extraction, including  $\beta$ -elimination and permethylation. O-glycans were detected by MALDI-MS. (EDA = ethylene diamine)**

| <b>List</b> | <b>HEK293</b>                    | <b>BIC2</b>                    | <b>BIC1</b>           |
|-------------|----------------------------------|--------------------------------|-----------------------|
| 1           | HexNAc(1)                        | HexNAc(1)                      | HexNAc(1)             |
| 2           | HexNAc(1)Hex(1)                  | HexNAc(1)Hex(1)                | HexNAc(1)Hex(1)       |
| 3           | HexNAc(1)Hex(2)                  | HexNAc(1)Hex(2)                | HexNAc(1)Hex(2)       |
| 4           | HexNAc(2)Hex(1)                  | HexNAc(2)Hex(1)                | HexNAc(2)Hex(1)       |
| 5           | HexNAc(1)Hex(2)Fuc(1)            | HexNAc(3)Fuc(1)                | HexNAc(3)Fuc(1)       |
| 6           | HexNAc(3)Fuc(1)                  | HexNAc(2)Hex(1)Fuc(2)          | HexNAc(2)Hex(1)Fuc(2) |
| 7           | HexNAc(3)Hex(2)NeuAc(1)EDA       | HexNAc(3)Hex(2)NeuAc(1)<br>EDA | HexNAc(4)Hex(2)Fuc(2) |
| 8           | HexNAc(2)Hex(3)Fuc(1)NeuAc(1)EDA | HexNAc(4)Hex(2)Fuc(2)          | HexNAc(3)Hex(4)Fuc(2) |
| 9           | HexNAc(4)Hex(2)Fuc(2)            | HexNAc(3)Hex(4)Fuc(2)          |                       |
| 10          | HexNAc(3)Hex(4)Fuc(2)            |                                |                       |

Figure S1. Schematic workflow of spike glycoprotein analysis using protease, MALDI-TOF/TOF-MS and LC-MS/MS. Sialic acid modification was performed by ethyl esterification for  $\alpha$ 2,6 linked and ethylene diamine (EDA) amidation for  $\alpha$ 2,3 linked sialic acids.

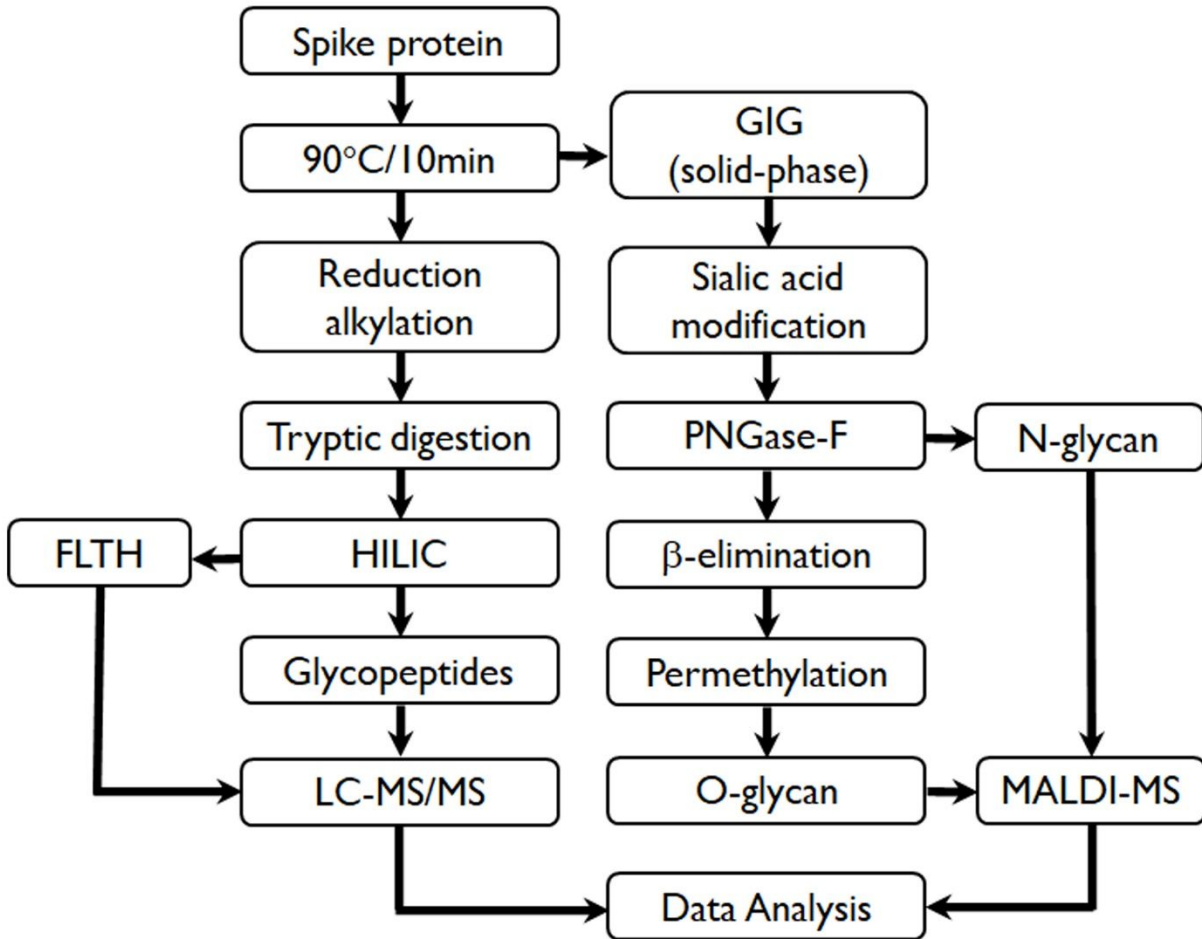

**Figure S2. Typical HCD fragmentation of O-glycopeptide precursor, AGCLIGAEHVNNSYECDIPIGAGICASYQTQT[678]NSPR, used for site-specific O-glycosite localization (SARS-CoV-2). The fragments contain one oxonium ion (204.08), one GalGalNAc (365.07), y-ions, and b-ions.**

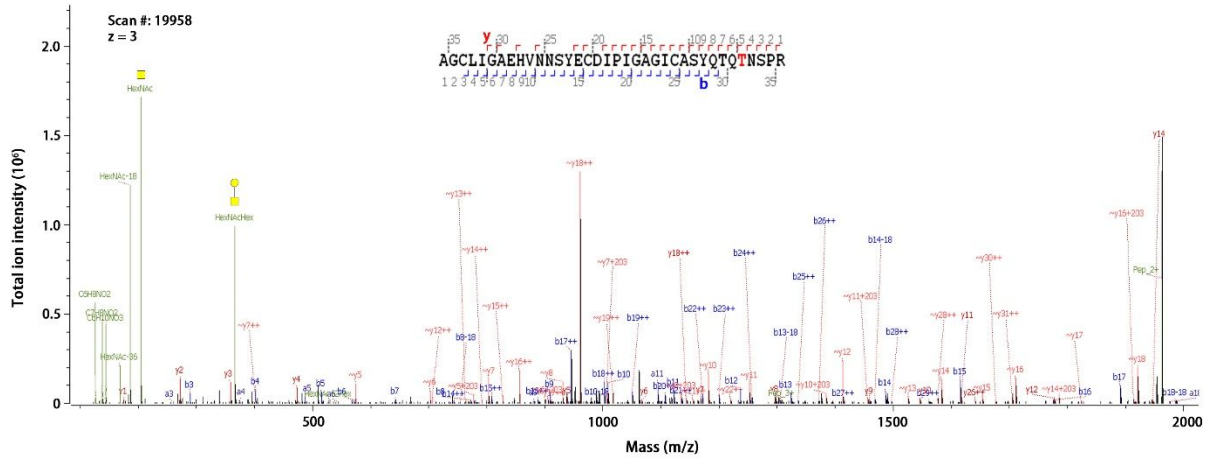

Figure S3. MALDI-MS of O-glycans of SARS-CoV-2 in BIC1, BIC2 and HEK293.

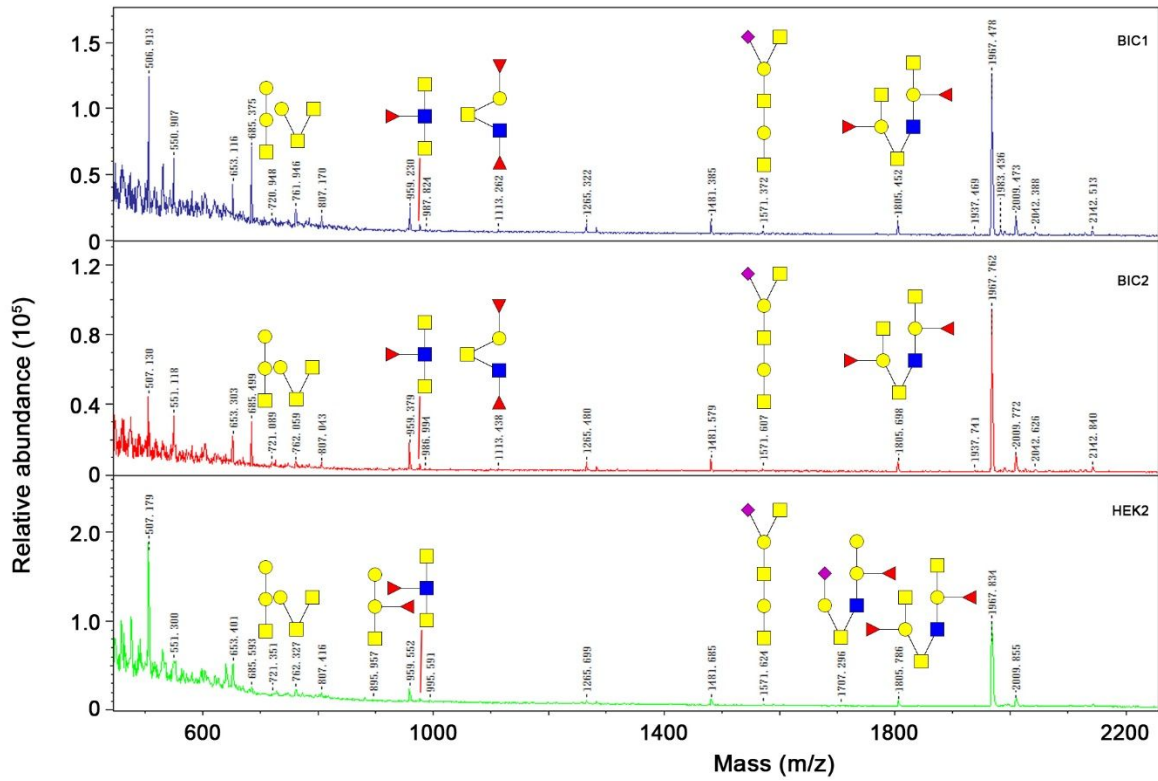

Supplement: ao1c01785_si_001.pdf [file ao1c01785_si_001.pdf]
